# Supplementary material for: Biodegradation of phenol and catechol in cloud water: comparison to chemical oxidation in the atmospheric multiphase system
Source: Copernicus journal article supplement (doi:10.5194/acp-20-4987-2020), 2020-04-28
Supplement: Supplementary file 1 [file acp-20-4987-2020-supplement.pdf]

Supplement of Atmos. Chem. Phys., 20, 4987–4997, 2020  
<https://doi.org/10.5194/acp-20-4987-2020-supplement>  
© Author(s) 2020. This work is distributed under  
the Creative Commons Attribution 4.0 License.

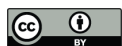

*Supplement of*

## **Biodegradation of phenol and catechol in cloud water: comparison to chemical oxidation in the atmospheric multiphase system**

**Saly Jaber et al.**

*Correspondence to:* Anne-Marie Delort (a-marie.delort@uca.fr) and Barbara Ervens (barbara.ervens@uca.fr)

The copyright of individual parts of the supplement might differ from the CC BY 4.0 License.

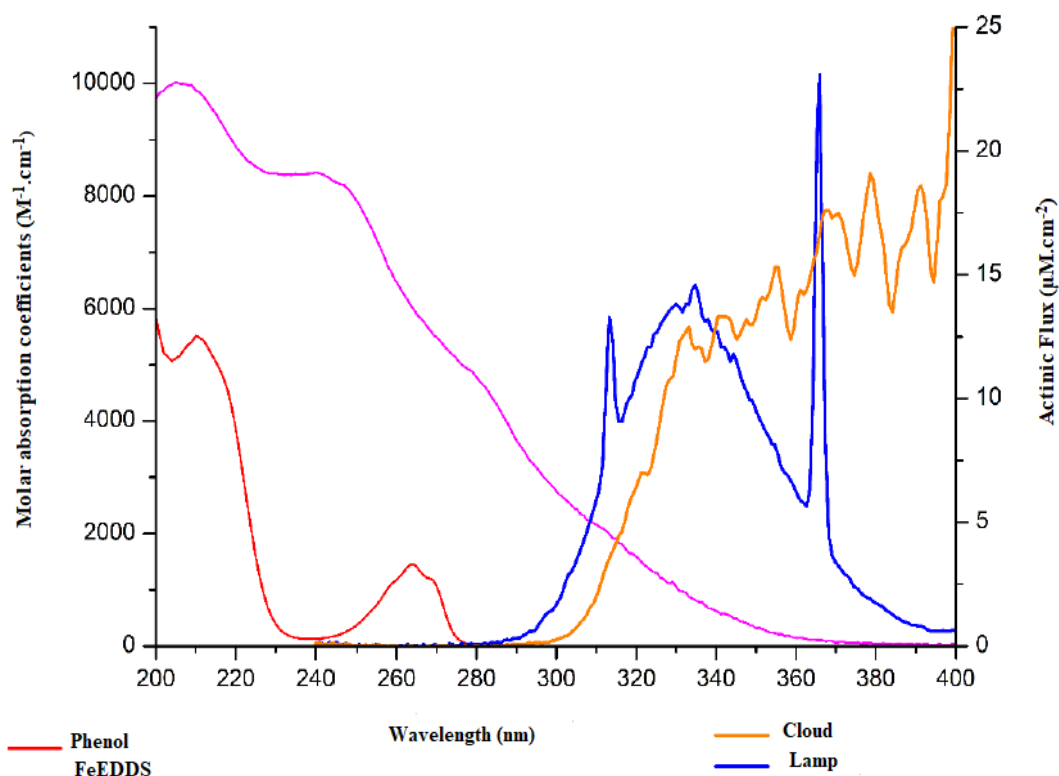

**Figure S1 :** Comparison of the actinic fluxes of the lamps used and the emission of the solar spectrum measured in-cloud at the puy de Dôme station. The blue line represents the actinic flux of the lamp; the brown line corresponds to the actinic flux of the solar emission spectrum in cloud. The pink line represents the molar absorption coefficient of the Fe-EDDS complex. The red line represents the molar absorption coefficient of phenol.

### Section S1 Calculation of the biodegradation rates for the *Pseudomonas* strains

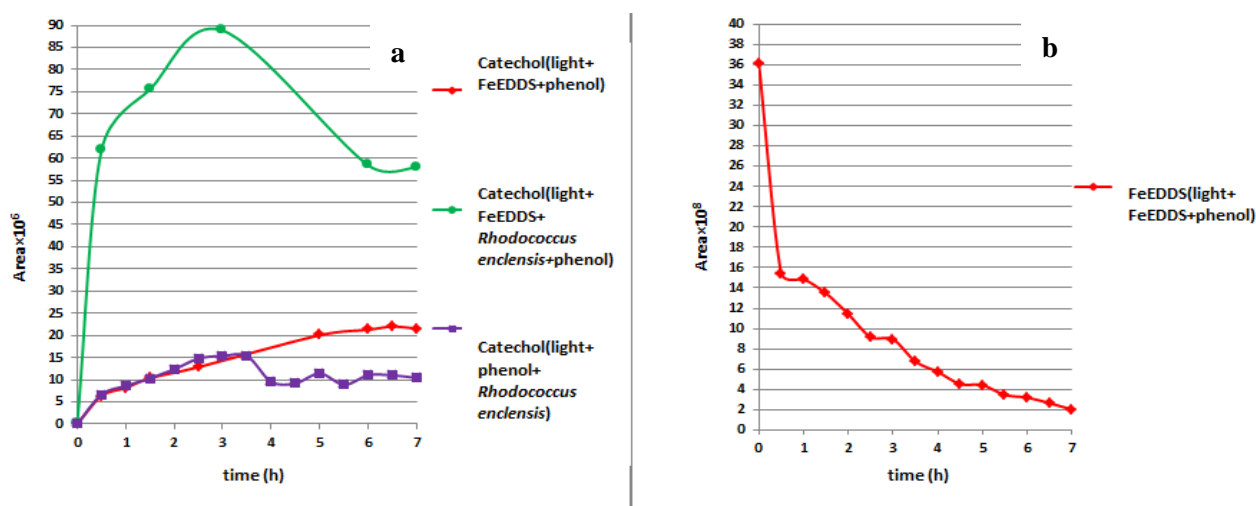

**Figure S2 :** a) time dependence of the integral of catechol signal ( $m/z = 110.03678$ ) detected in mass spectra of incubations with Fe(EDDS)+light and Phenol (red), Fe(EDDS)+ light, Phenol and *R. enclensis* (green), light + Phenol and *R. enclensis* without Fe(EDDS)(violet). b) Time dependence of the integral of Fe(EDDS) signal ( $m/z = 346.0086$ ) detected in the mass spectrum, recorded during the incubation with Fe(EDDS)+light and Phenol.

### SI.1 *Pseudomonas putida* EKII

To calculate the biodegradation rate of phenol and catechol by *Pseudomonas putida* EKII, based on experiments performed at pH = 7.0, we used the following data from Hinteregger et al. (1992):

**Phenol:** Biodegradation of 654  $\mu\text{mol L}^{-1} \text{h}^{-1}$ , number of cells:  $3.3 \cdot 10^9 \text{ cell L}^{-1}$

5 **Biodegradation rate of phenol:  $1.98 \cdot 10^{-17} \text{ mol cell}^{-1} \text{ h}^{-1}$**

**Catechol:** Biodegradation rate of catechol is twelve times higher than of phenol (ratio =  $2.4 \mu\text{mol min}^{-1} \text{ mg}^{-1} / 0.2 \mu\text{mol min}^{-1} \text{ mg}^{-1}$ , expressed per mg of cells)

**Biodegradation of catechol:  $1.98 \cdot 10^{-17} \cdot 12 = 23.78 \cdot 10^{-17} \text{ mol cell}^{-1} \text{ h}^{-1}$**

10

### SI.2 *Pseudomonas aeruginosa*

To calculate the biodegradation rate of phenol and catechol by *Pseudomonas aeruginosa*, based on experiments performed at pH=7.0, we used the following data from Razika et al. (2010):

**Phenol:** Biodegradation of 10  $\text{mg L}^{-1}$  during 96 hours, number concentration of cells:  $4.7 \cdot 10^9 \text{ cell L}^{-1}$

15 **Biodegradation rate of phenol:  $23.49 \cdot 10^{-17} \text{ mol cell}^{-1} \text{ h}^{-1}$**

Biodegradation of 50  $\text{mg L}^{-1}$  during 120 hours, number concentration of cells:  $4.7 \cdot 10^9 \text{ cell L}^{-1}$

**Biodegradation rate of phenol:  $94.31 \cdot 10^{-17} \text{ mol cell}^{-1} \text{ h}^{-1}$**

**Biodegradation rate of phenol (average value) taken into account:  $58.9 \cdot 10^{-17} \text{ mol cell}^{-1} \text{ h}^{-1}$**

20 **Catechol:** No information is available in Razika et al (2010), so we multiplied the biodegradation rates of phenol with a factor of twelve as it is within the same order of magnitude of what we found in our study (Factor ~ 10)

**Biodegradation rate of catechol (average value):  $58.9 \cdot 10^{-17} \text{ mol cell}^{-1} \text{ h}^{-1} \cdot 12 = 706.8 \cdot 10^{-17} \text{ mol cell}^{-1} \text{ h}^{-1}$ .**

25

## Section S2: Calculation of photolysis rate $j(\text{Fe(EDDS)})$ and resulting $\bullet\text{OH}$ concentration in the experiments

$$j = \int_{250}^{400} I_{0,\lambda} \cdot \varepsilon_{\lambda} \cdot \phi_{\lambda} \cdot d\lambda \frac{\text{photons}}{\text{cm}^2 \text{ s nm molec cm}} \frac{\text{cm}^3}{\text{molec cm}} \frac{\text{nm}}{\text{cm}} \quad [\text{s}^{-1}]$$

30  $I_{0,\lambda}$  = spectral actinic flux [photons  $\text{cm}^{-2} \text{ s}^{-1} \text{ nm}^{-1}$ ]

$\varepsilon_{\lambda}$  = extinction coefficient [ $\text{cm}^3 \text{ molec}^{-1} \text{ cm}^{-1}$ ]

$\phi_{\lambda}$  = Quantum yield [dimension less]

---

### Experimental data

Irradiance  $E(\lambda)$  [ $\mu\text{W cm}^{-2}$ ]; convert into SI units  $E'[\text{W/m}^2] = E \cdot 10^{-6} \text{ W}/\mu\text{W} \cdot 10^4 \text{ cm}^2/\text{m}^2 = E \cdot 0.01$

35 Convert irradiance  $E(\lambda)$  [ $\mu\text{W cm}^{-2}$ ] to actinic flux  $I$  [photons  $\text{cm}^{-2} \text{ s}^{-1}$ ]:

$$\text{Actinic flux} \quad I' = \frac{E' \lambda}{h \cdot c} \left[ \frac{\text{W m}}{\text{m}^2} \frac{\text{s}}{\text{J s m}} \right] = \frac{E' \lambda}{h \cdot c} \left[ \frac{\text{kg m}^2 \text{ m}}{\text{s}^3 \text{m}^2} \frac{\text{s}^2}{\text{kg m}^2 \text{ s m}} \right] = \frac{\text{photons}}{\text{m}^2 \text{ s}}$$

$$\text{Spectral actinic flux} \quad I_{\lambda} = \frac{I'}{\lambda} \cdot 10^{-4} = \frac{E(\lambda)}{h \cdot c} \left[ \frac{\text{W}}{\text{m}^2} \frac{\text{s}}{\text{J s m}} \right] = \frac{E \lambda}{h \cdot c} \left[ \frac{\text{kg m}^2 \text{ m}}{\text{s}^3 \text{m}^2} \frac{\text{s}^2}{\text{kg m}^2 \text{ s m}} \right] = \frac{\text{photons}}{\text{cm}^2 \text{ s nm}}$$

$$h = 6.62606 \times 10^{-34} \text{ J s}$$

$$c = 3 \cdot 10^8 \text{ m/s}$$

40  $\varepsilon'$  molar absorption coefficient ( $\text{L mol}^{-1} \text{ cm}^{-1}$ ) = extinction coefficient

$$\varepsilon_{\lambda} = \varepsilon' \frac{\text{L}}{\text{mol cm}} \cdot \frac{1000 \text{ cm}^3}{\text{L}} \cdot \frac{\text{mol}}{6.022 \times 10^{23} \text{ molec}} = \varepsilon' \cdot 1000/N_A [\text{cm}^3 \text{ molec}^{-1} \text{ cm}^{-1}]$$


---

Quantum yield:  $\phi_{\lambda} = 0.025$  (at  $290 < \lambda < 400 \text{ nm}$ )

$$j = \int_{250}^{400} I_{\lambda} \cdot \varepsilon_{\lambda} \cdot \phi_{\lambda} \cdot d\lambda \frac{\text{photons}}{\text{cm}^2 \text{ s nm molec cm}} \frac{\text{cm}^3}{\text{molec cm}} \frac{\text{nm}}{\text{cm}} = \mathbf{0.001388 \text{ s}^{-1}}$$


---

45

### Calculation of steady-state $\bullet\text{OH}(\text{aq})$ concentration

#### $\bullet\text{OH}$ formation:

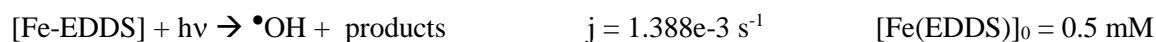

$$-\frac{d[\text{Fe(EDDS)}]}{dt} = \frac{d[\bullet\text{OH}]}{dt} = j [\text{Fe(EDDS)}]$$

50  $\bullet\text{OH}$  loss

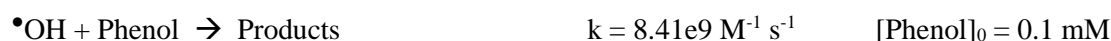

$$\frac{d[\bullet\text{OH}]}{dt} = -k [\bullet\text{OH}][\text{Phenol}]$$

→ Steady-state OH concentration at the beginning of experiment

$$k [\bullet\text{OH}][\text{Phenol}] = j [\text{Fe(EDDS)}]$$

$$55 \quad [\text{OH}] = \frac{j [\text{Fe(EDDS)}]}{k [\text{Phenol}]} = \frac{1.388 \times 10^{-3} \text{ s}^{-1} \cdot 5 \times 10^{-4} \text{ M}}{8.41 \times 10^9 \text{ M}^{-1} \text{ s}^{-1} \cdot 1 \times 10^{-4} \text{ M}} = 8.3 \times 10^{-13} \text{ M}$$

## Section S3: Input data to the multiphase box model

### S3.1: Multiphase processes

*Table S1: Chemical and microbial processes in the multiphase model*

| Gas Phase                                                                                |                                                              |                                                                                                                                                                                                   |                 |                                                                    |
|------------------------------------------------------------------------------------------|--------------------------------------------------------------|---------------------------------------------------------------------------------------------------------------------------------------------------------------------------------------------------|-----------------|--------------------------------------------------------------------|
|                                                                                          | Chemical rate constant<br>[cm <sup>3</sup> s <sup>-1</sup> ] | Reference                                                                                                                                                                                         |                 |                                                                    |
| •OH + Phenol → 0.5 Catechol + 0.5 Prod <sup>a)</sup>                                     | 2.81 · 10 <sup>-11</sup>                                     | (Berndt and Böge, 2001)                                                                                                                                                                           |                 |                                                                    |
| NO <sub>3</sub> • + Phenol → Products                                                    | 5.8 · 10 <sup>-12</sup>                                      | (Bolzacchini et al., 2001)                                                                                                                                                                        |                 |                                                                    |
| •OH + Catechol → Products                                                                | 1.1 · 10 <sup>-10</sup>                                      | (Olariu et al., 2000)                                                                                                                                                                             |                 |                                                                    |
| NO <sub>3</sub> • + Catechol → Products                                                  | 9.8 · 10 <sup>-11</sup>                                      | (Olariu et al., 2004)                                                                                                                                                                             |                 |                                                                    |
| Aqueous phase                                                                            |                                                              |                                                                                                                                                                                                   |                 |                                                                    |
|                                                                                          | Chemical rate constant<br>[M <sup>-1</sup> s <sup>-1</sup> ] | Reference                                                                                                                                                                                         |                 |                                                                    |
| •OH + Phenol → 0.5 Catechol + 0.5 Prod <sup>b)</sup>                                     | 8.41 · 10 <sup>9</sup>                                       | (Raghavan and Steenken, 1980)                                                                                                                                                                     |                 |                                                                    |
| NO <sub>3</sub> • + Phenol → Products                                                    | 1.9 · 10 <sup>9</sup>                                        | (Umschlag et al., 2002)                                                                                                                                                                           |                 |                                                                    |
| •OH + Catechol → Products                                                                | 4.7 · 10 <sup>9</sup>                                        | (Hoffmann et al., 2018)                                                                                                                                                                           |                 |                                                                    |
| NO <sub>3</sub> • + Catechol → Products                                                  | 1.9 · 10 <sup>9</sup>                                        | (Hoffmann et al., 2018)                                                                                                                                                                           |                 |                                                                    |
| •OH + WSOC → Products                                                                    | 2 · 10 <sup>6</sup> s <sup>-1</sup>                          | Based on (Arakaki et al., 2013), assuming [WSOC] = 5 mM                                                                                                                                           |                 |                                                                    |
| NO <sub>3</sub> • → Products                                                             | 10 <sup>5</sup> s <sup>-1</sup>                              | Based on (Exner et al., 1992; Zellner and Herrmann, 1994); assuming 1 mM Cl <sup>-</sup> , 0.01 mM Br <sup>-</sup>                                                                                |                 |                                                                    |
| The following three reactions are only considered in sensitivity simulations, Figure S-4 |                                                              |                                                                                                                                                                                                   |                 |                                                                    |
| O <sub>3</sub> + Phenol → Products                                                       | 1300                                                         | (Hoigné and Bader, 1983)                                                                                                                                                                          |                 |                                                                    |
| O <sub>3</sub> + Catechol → Products                                                     | 3.1 · 10 <sup>5</sup>                                        | (Gurol and Nekouinaini, 1984)                                                                                                                                                                     |                 |                                                                    |
| HO <sub>2</sub> •/O <sub>2</sub> • + Catechol → Products                                 | 7.8 · 10 <sup>4</sup>                                        | Rate constant for HO <sub>2</sub> /O <sub>2</sub> • ratio at pH = 4 (pK <sub>a</sub> (HO <sub>2</sub> •) = 4.8) calculated based on k <sub>HO2</sub> , k <sub>O2•</sub> by (Bielski et al., 1985) |                 |                                                                    |
|                                                                                          |                                                              | Microbial rate constant<br>[L cell <sup>-1</sup> s <sup>-1</sup> ]                                                                                                                                |                 |                                                                    |
| <i>Rhodococcus</i> + Phenol → Catechol                                                   |                                                              | 1.8 · 10 <sup>-13</sup>                                                                                                                                                                           | d)              |                                                                    |
| <i>Rhodococcus</i> + Catechol → Products                                                 |                                                              | 1.5 · 10 <sup>-12</sup>                                                                                                                                                                           | d)              |                                                                    |
| <i>Pseudomonas</i> + Phenol → Catechol                                                   |                                                              | 1 · 10 <sup>-13</sup>                                                                                                                                                                             | d)              |                                                                    |
| <i>Pseudomonas</i> + Catechol → Prod                                                     |                                                              | 1.2 · 10 <sup>-12</sup>                                                                                                                                                                           | d)              |                                                                    |
| Phase transfer processes                                                                 |                                                              |                                                                                                                                                                                                   |                 |                                                                    |
|                                                                                          | K <sub>H</sub><br>[M atm <sup>-1</sup> ]                     | Reference                                                                                                                                                                                         | α <sup>c)</sup> | D <sub>g</sub><br>[cm <sup>2</sup> s <sup>-1</sup> ] <sup>e)</sup> |
| •OH(aq) ↔ •OH(gas)                                                                       | 25                                                           | (Kläning et al., 1985)                                                                                                                                                                            | 0.05            | 0.15                                                               |
| NO <sub>3</sub> • (aq) ↔ NO <sub>3</sub> • (gas)                                         | 0.6                                                          | (Rudich et al., 1996)                                                                                                                                                                             | 0.1             | 0.1                                                                |
| Phenol(aq) ↔ Phenol(gas)                                                                 | 647                                                          | (Feigenbrugel et al., 2004)                                                                                                                                                                       | 0.027           | 0.09                                                               |
| Catechol(aq) ↔ Catechol(gas)                                                             | 8.31 · 10 <sup>5</sup>                                       | (Sander, 2015)                                                                                                                                                                                    | 0.1             | 0.08                                                               |

<sup>a)</sup> Catechol yield likely represents an upper estimate for the total of all dihydroxybenzene compounds <sup>b)</sup> Initial formation of the phenoxy radical and the subsequent reaction with O<sub>2</sub> are lumped here, leading to 0.5 catechol into one step since the second reaction is diffusion controlled; <sup>c)</sup> These values were taken from CAPRAM (Ervens et al., 2003; Hoffmann et al., 2018) <sup>d)</sup> See calculation of values in Section S-3.2

5

### S3.2 Calculation of microbial rate constants from experimentally derived rates

Experimentally-derived rates  $R$  of microbial activity towards phenol and catechol are summarized in Table 2 of the main part of the manuscript, together with the bacteria type (*Rhodococcus*, *Pseudomonas putida*, *Pseudomonas aeruginosa*) and aqueous phase concentrations of substrate (phenol, catechol) and bacteria cells. Strictly, the measured rates might be only valid for the same substrate-to-cell ratio as the substrate availability determines the cell activity. Since these concentrations differ greatly, we derive the first-order rate constant  $k'$  [ $\text{h}^{-1}$ ]

$$k' = R [\text{Cell}] / [\text{Substrate}] \quad (\text{Eq-S1})$$

Ambient cell concentrations in cloud water are on the order of  $10^6 - 10^8 \text{ cell L}^{-1}$ . We assume a total cell concentration of  $6.8 \cdot 10^7 \text{ cell L}^{-1}$  of which 3.6% are *Rhodococcus* ( $C_{\text{Rh,cloud}} = 2.7 \cdot 10^6 \text{ cell L}^{-1}$ ) and 19.5% *Pseudomonas* ( $C_{\text{Ps,cloud}} = 1.3 \cdot 10^7 \text{ cell L}^{-1}$ ). Phenol concentrations in cloud water are in the range of 5.5 - 7.7 nM (Lebedev et al., 2018). Using the lower value of this range yields phenol-to-cell ratios in cloud water of  $2 \cdot 10^{-15} \text{ mol cell}^{-1}$  and  $4.2 \cdot 10^{-16} \text{ mol cell}^{-1}$  for *Rhodococcus* and *Pseudomonas*, respectively, which is within two orders of magnitude of the ratios as used in the experiments. Corresponding cloud water measurements for catechol are not available.

In the multiphase model, we describe the microbial processes analogous to chemical reactions, i.e. with a formal second-order rate constant in units of  $\text{L cell}^{-1} \text{ s}^{-1}$  using the constant cell concentrations in the aqueous phase.

$$k_{2\text{nd}} [\text{L cell}^{-1} \text{ s}^{-1}] = k' / [\text{Cell}]_{\text{cloud}} / 3600 \text{ s h}^{-1} \quad (\text{Eq-S2})$$

The resulting  $k_{2\text{nd}}$  are then used in the model studies for the assumed (constant) cell concentrations in cloud water.

### S3.3 Considerations of potential pH dependence of the chemical and biodegradation rates

It can be expected that none of the rates in Eq-2 shows any significant dependence on cloud relevant pH values due to the following reasoning:

**$k_{\text{chem,gas}}$ :** The gas phase rate constants describe chemical processes in the gas phase and, thus, are independent of any solution properties, such as pH.

**$k_{\text{chem,aq}}$ :** The rate constants of  $\text{NO}_3^\bullet$  and  $^\bullet\text{OH}$  reactions with the phenolic aromatics are not expected to show any pH dependence since the reactions occur via H-abstraction and thus the rate constants are a function of the bond strength of the hydrogen bonds (e.g. discussion in (Herrmann, 2003)). Even though the rate constant of  $\text{NO}_3^\bullet$  and  $^\bullet\text{OH}$  with phenol and catechol have not been investigated as a function of pH, the small variability of rate constants of other alcohols (e.g. NIST solution data base), suggests that our assumption of a pH-independent  $k_{\text{chem,aq}}$  is reasonable. Only if the pH value increases to very high pH values, i.e. near the acid dissociation values of phenols ( $\text{pK}_a \sim 10$ ), differences in the reaction mechanisms (e.g. electron transfer) and, thus, in rate constants may be expected.

**$k_{\text{bact,aq}}$ :** We have shown in previous studies that the biodegradation rates for several organics and bacteria strains do not show any systematic dependence on pH within a range of  $\sim 5 < \text{pH} < \sim 6.3$  (Väitilingom et al., 2011). This insensitivity to the surrounding solution pH is expected: Unlike chemical reactions, the biodegradation does not occur in the surrounding water phase, but within the bacteria cells which self-regulate their pH values to a range of 6.5-7, even if the surrounding pH varies over wide ranges. Only at very acidic ( $\text{pH} < 2$ ) or very alkaline ( $\text{pH} > 10$ ) solutions, the internally buffered pH value within the cells might be different.

**[Radical]:** For both radicals,  $\bullet\text{OH}$  and  $\text{NO}_3\bullet$ , the main source in the aqueous phase is the direct uptake from the gas phase, e.g. (Ervens et al., 2003; Tilgner et al., 2013). Since gas phase processes are independent of pH, the radical gas phase concentration is not affected by the solution pH. Other source processes of the  $\bullet\text{OH}(\text{aq})$  radical include aqueous phase reactions, such as the direct photolysis of  $\text{H}_2\text{O}_2$  or Fenton reactions (reactions of iron(II) with hydroperoxides), which also do not show any pH dependence over the range of relevant values ( $\sim 2 < \text{pH} < \sim 7$ )

**[Aromatic]:** The concentrations of the aromatics are initial values of the model. Given that [Aromatic] is included in all three terms in Eq-R1, they cancel anyway in the comparison of the three terms for a given simulation.

**$K_{\text{H}}$ :** Henry's laws constants for the radicals or aromatics, respectively, do not show any pH dependence. Admittedly, there are only very few pH dependent measurements available for these and related compounds. Only at very high pH values, i.e. near the  $\text{pK}_a$  values of the phenols ( $\text{pH} \sim 10$ ), the effective Henry's law constants for the aromatics may be higher than the physical Henry's law constants. As pH value of cloud water is significantly below this threshold, it is safe to neglect this dissociation.

**$\alpha$ :** The mass accommodation coefficient describes the probability of a molecule to 'stick' on a surface upon collision. There is no physical reason why this process should pH dependent and there is no data that corroborate such a dependency.

**$D_{\text{g}}$ :** Gas phase diffusion is a process that occurs only in the gas phase and thus is independent of any solution properties (including pH).

**Table S2:** Summary of literature data on microbial activity towards phenol and catechol by *Rhodococcus* and *Pseudomonas*. For the estimates of unknown rates, refer to Section 3.2 (Comparison to literature data) in the main part of the manuscript

| Substrate | Bacteria type                   | R<br>/ mol cell <sup>-1</sup> h <sup>-1</sup> | [Substrate]<br>/ M    | [Cell] <sub>experiment</sub><br>/ (cell L <sup>-1</sup> ) | Ref | [Substrate]/<br>[Cell]<br>/ mol cell <sup>-1</sup> | k'<br>/ h <sup>-1</sup> | [Cell] <sub>cloud</sub> | k <sub>2nd</sub><br>/ L cell <sup>-1</sup> s <sup>-1</sup> |
|-----------|---------------------------------|-----------------------------------------------|-----------------------|-----------------------------------------------------------|-----|----------------------------------------------------|-------------------------|-------------------------|------------------------------------------------------------|
| Phenol    | <i>Rhodococcus</i>              | 1.76·10 <sup>-16</sup>                        | 10 <sup>-4</sup>      | 10 <sup>9</sup>                                           | a   | 10 <sup>-13</sup>                                  | 1.76·10 <sup>-3</sup>   | 2.7·10 <sup>6</sup>     | 1.8·10 <sup>-13</sup>                                      |
| Catechol  | <i>Rhodococcus</i>              | 1.5·10 <sup>-15</sup>                         | 10 <sup>-4</sup>      | 10 <sup>9</sup>                                           | b   | 10 <sup>-13</sup>                                  | 1.5·10 <sup>-2</sup>    | 2.7·10 <sup>6</sup>     | 1.5·10 <sup>-12</sup>                                      |
| Phenol    | <i>Pseudomonas putida</i>       | 1.99·10 <sup>-17</sup>                        | 6.54·10 <sup>-4</sup> | 3.3·10 <sup>9</sup>                                       | c   | 2·10 <sup>-13</sup>                                | 1·10 <sup>-4</sup>      |                         |                                                            |
| Catechol  | <i>Pseudomonas putida</i>       | 2.39·10 <sup>-16</sup>                        |                       |                                                           | c   |                                                    | 2.4·10 <sup>-3</sup>    |                         |                                                            |
| Phenol    | <i>Pseudomonas</i>              | 2.35·10 <sup>-16</sup>                        | 1.06·10 <sup>-4</sup> | 4.7·10 <sup>9</sup>                                       | d   | 2.3·10 <sup>-14</sup>                              | 1·10 <sup>-2</sup>      |                         |                                                            |
|           | <i>aeruginosa</i>               | 9.43·10 <sup>-16</sup>                        | 5.31·10 <sup>-4</sup> | 4.7·10 <sup>9</sup>                                       |     | 1.1·10 <sup>-13</sup>                              | 8.3·10 <sup>-3</sup>    |                         |                                                            |
| Catechol  | <i>Pseudomonas</i>              |                                               |                       |                                                           | e   |                                                    | 0.11                    |                         |                                                            |
|           | <i>aeruginosa</i>               |                                               |                       |                                                           |     |                                                    |                         |                         |                                                            |
| Phenol    | <i>Pseudomonas</i><br>(Average) |                                               |                       |                                                           |     |                                                    | 5·10 <sup>-3</sup>      | 1.3·10 <sup>7</sup>     | 1·10 <sup>-13</sup>                                        |
| Catechol  | <i>Pseudomonas</i><br>(Average) |                                               |                       |                                                           |     |                                                    |                         | 1.3·10 <sup>7</sup>     | 1.2·10 <sup>-12</sup>                                      |

<sup>a)</sup> (Lallement et al., 2018), <sup>b)</sup> This study, <sup>c)</sup> (Hinteregger et al., 1992) <sup>d)</sup> (Razika et al., 2010), <sup>e)</sup> Scaled up from data for phenol by reference <sup>d)</sup> using the same ratio of activities to phenol and catechol (12) as for the average value for *Pseudomonas putida*



## Section S4: Model sensitivity study including the aqueous phase reactions of phenol with ozone and of catechol with ozone and HO<sub>2</sub><sup>•</sup>/O<sub>2</sub><sup>•-</sup>

In a recent model study by (Hoffmann et al., 2018), it was suggested that catechol (and other dihydroxybenzenes) are efficiently oxidized not only by •OH but also by ozone and the hydroperoxy (HO<sub>2</sub><sup>•</sup>/O<sub>2</sub><sup>•-</sup>) radical. Also the reaction of phenol with ozone was included in this model study. In that latter model study, a rate constant of  $k(\text{O}_3 + \text{Catechol}) = 5.2 \cdot 10^5 \text{ M}^{-1} \text{ s}^{-1}$  was estimated. This rate constant is similar to an experimentally-derived value of  $k(\text{O}_3 + \text{Catechol}) = 3.1 \cdot 10^5 \text{ M}^{-1} \text{ s}^{-1}$  (Gürol and Nekouinaini, 1984). This latter study was performed at very acidic conditions (pH = 1.5) and a strong pH dependence of the rate constant was pointed out leading to a decreasing rate constant with increasing pH and resulting in the predominance of the •OH reaction at atmospherically-relevant pH values (~5).

Since the exact pH dependence is not available, we show in the following model results from a sensitivity studies including the HO<sub>2</sub><sup>•</sup> and O<sub>3</sub> reactions in order to provide an upper estimate of their role in the multiphase system. Initial concentrations of 0.1 ppt HO<sub>2</sub><sup>•</sup> and 40 ppb ozone in the gas phase are assumed and held constant throughout the simulation. In agreement with the model results by Hoffmann et al. (2018), we find large contributions of the ozone reactions in the aqueous phase to the total loss. The relative contributions of the ozone (57 – 68%) and HO<sub>2</sub><sup>•</sup>/O<sub>2</sub><sup>•-</sup> (16 – 19%) reactions with catechol predicted here are also similar as predicted in the previous model study.

### S4.2 Model results

All model results [relative contribution to total loss [%]] are summarized in Table S-3. The upper part of the table contains results for the base simulations as shown in Figure 4 (microbial aqueous phase processes and •OH and NO<sub>3</sub><sup>•</sup> reactions in gas and aqueous phases); the bottom part of the table includes results for the sensitivity simulations that also include HO<sub>2</sub><sup>•</sup>(aq) and O<sub>3</sub>(aq) reactions (Figure S3).

**Table S3:** Model results of base case and sensitivity simulations: Relative contributions to total loss of phenol and catechol, respectively

|                                                                                                                                                                          |          | •OH(g) | NO <sub>3</sub> <sup>•</sup> (g) | •OH(aq) | NO <sub>3</sub> <sup>•</sup> (aq) | O <sub>3</sub> (aq) | HO <sub>2</sub> <sup>•</sup> (aq) | <i>Rhodococcus</i> | <i>Pseudomonas</i> |
|--------------------------------------------------------------------------------------------------------------------------------------------------------------------------|----------|--------|----------------------------------|---------|-----------------------------------|---------------------|-----------------------------------|--------------------|--------------------|
| <b>Base case</b>                                                                                                                                                         |          |        |                                  |         |                                   |                     |                                   |                    |                    |
| Day                                                                                                                                                                      | Phenol   | 99.8   | 0                                | 0.22    | 0                                 | -                   | -                                 | 0.01               | 0.006              |
|                                                                                                                                                                          | Catechol | 69.3   | 0                                | 14      | 0                                 | -                   | -                                 | 9.3                | 7.4                |
| Night                                                                                                                                                                    | Phenol   | 0      | 99.8                             | 0       | 0.18                              | -                   | -                                 | 0.0005             | 0.00027            |
|                                                                                                                                                                          | Catechol | 0      | 97.5                             | 0       | 2.2                               | -                   | -                                 | 0.18               | 0.14               |
| <b>Sensitivity simulation including aqueous phase reactions of O<sub>3</sub> (phenol, catechol) and HO<sub>2</sub><sup>•</sup>/O<sub>2</sub><sup>•-</sup> (catechol)</b> |          |        |                                  |         |                                   |                     |                                   |                    |                    |
| Day                                                                                                                                                                      | Phenol   | 99.7   | 0                                | 0.22    | 0                                 | 0.02                | 0                                 | 0.01               | 0.0056             |
|                                                                                                                                                                          | Catechol | 6.1    | 0                                | 1.2     | 0                                 | 58.9                | 33                                | 0.81               | 0.65               |
| Night                                                                                                                                                                    | Phenol   | 0      | 99.8                             | 0       | 0.18                              | 0.0007              | 0                                 | 0.0005             | 0.00027            |
|                                                                                                                                                                          | Catechol | 0      | 86.4                             | 0       | 2                                 | 11.4                | 0                                 | 0.16               | 0.13               |

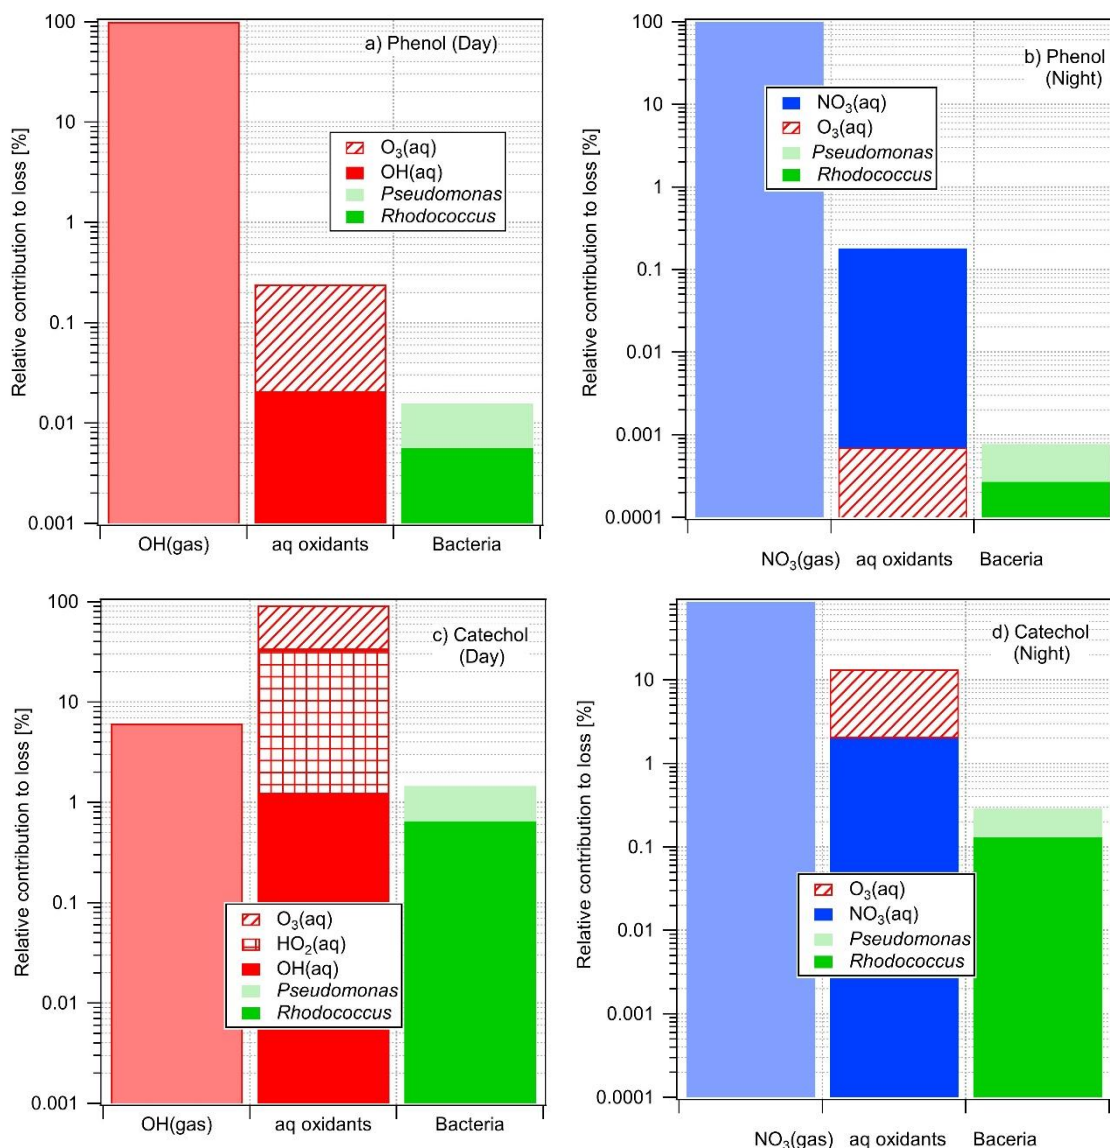

**Figure S3** : Relative contributions to total loss of phenol (a, b) and catechol (c, d) in the multiphase system including  $\text{HO}_2^\bullet$  and  $\text{O}_3$  reactions in the aqueous phase (Table S-3).

## References

- Arakaki, T., Anastasio, C., Kuroki, Y., Nakajima, H., Okada, K., Kotani, Y., Handa, D., Azechi, S., Kimura, T., Tsuchi, A. and Miyagi, Y.: A general scavenging rate constant for reaction of hydroxyl radical with organic carbon in atmospheric waters, *Env. Sci Technol*, 47(15), 8196–8203, doi:10.1021/es401927b, 2013.
- Berndt, T. and Böge, O.: Gas-phase reaction of OH radicals with benzene: products and mechanism, *Phys. Chem. Chem. Phys.*, 3(22), 4946–4956, 2001.
- Bielski, B. H. J., Cabell, D. E., Arudi, R. L. and Ross, A., . B.: Reactivity of  $\text{HO}_2/\text{O}_2^-$  radicals in aqueous solution, *J Phys Chem Ref Data*, 14(4), 1041–1100, 1985.
- Bolzacchini, E., Bruschi, M., Hjorth, J., Meinardi, S., Orlandi, M., Rindone, B. and Rosenbohm, E.: Gas-Phase Reaction of Phenol with  $\text{NO}_3$ , *Environ. Sci. Technol.*, 35(9), 1791–1797, doi:10.1021/es001290m, 2001.
- Ervens, B., George, C., Williams, J. E., Buxton, G. V., Salmon, G. A., Bydder, M., Wilkinson, F., Dentener, F., Mirabel, P., Wolke, R. and Herrmann, H.: CAPRAM2.4 (MODAC mechanism): An extended and condensed

- tropospheric aqueous phase mechanism and its application, *J Geophys Res*, 108(D14), 4426, doi:doi:10.1029/2002JD002202, 2003.
- Exner, M., Herrmann, H. and Zellner, R.: Laser-based studies of reactions of the nitrate radical in aqueous solution, *Berichte Bunsenges Phys Chem*, 96, 470–477, 1992.
- 5 Feigenbrugel, V., Le Calvé, S., Mirabel, P. and Louis, F.: Henry's law constant measurements for phenol, o-, m-, and p-cresol as a function of temperature, *Atmos. Environ.*, 38(33), 5577–5588, doi:10.1016/j.atmosenv.2004.06.025, 2004.
- Gurol, M. D. and Nekouinaini, S.: Kinetic behavior of ozone in aqueous solutions of substituted phenols, *Ind. Eng. Chem. Fundam.*, 23(1), 54–60, doi:10.1021/i100013a011, 1984.
- 10 Hinteregger, C., Leitner, R., Loidl, M., Ferschl, A. and Streichsbier, F.: Degradation of phenol and phenolic compounds by *Pseudomonas putida* EKII, *Appl. Microbiol. Biotechnol.*, 37(2), 252–259, doi:10.1007/BF00178180, 1992.
- Hoffmann, E. H., Tilgner, A., Wolke, R., BÄ¶lge, O., Walter, A. and Herrmann, H.: Oxidation of substituted aromatic hydrocarbons in the tropospheric aqueous phase: kinetic mechanism development and modelling, *Phys. Chem. Chem. Phys.*, 20(16), 10960–10977, doi:10.1039/C7CP08576A, 2018.
- 15 Hoigné, J. and Bader, H.: Rate constants of reactions of ozone with organic and inorganic compounds in water—I: Non-dissociating organic compounds, *Water Res.*, 17(2), 173–183, doi:10.1016/0043-1354(83)90098-2, 1983.
- Kläning, U. K., Sehested, K. and Holcman, J.: Standard Gibbs energy of formation of the hydroxyl radical in aqueous solution. Rate constants for the reaction  $\text{ClO}_2^- + \text{O}_3 = \text{O}_3^- + \text{ClO}_2$ , *J Phys Chem*, 89, 760–763, 1985.
- 20 Lallement, A., Besaury, L., Tixier, E., Sancelme, M., Amato, P., Vinatier, V., Canet, I., Polyakova, O. V., Artaev, V. B., Lebedev, A. T., Deguillaume, L., Mailhot, G. and Delort, A.-M.: Potential for phenol biodegradation in cloud waters, *Biogeosciences*, 15(18), 5733–5744, doi:10.5194/bg-15-5733-2018, 2018.
- Lebedev, A. T., Polyakova, O. V., Mazur, D. M., Artaev, V. B., Canet, I., Lallement, A., Väitilingom, M., Deguillaume, L. and Delort, A.-M.: Detection of semi-volatile compounds in cloud waters by GC×GC-TOF-MS.
- 25 Evidence of phenols and phthalates as priority pollutants, *Environ. Pollut.*, 241, 616–625, doi:10.1016/j.envpol.2018.05.089, 2018.
- Olariu, R. I., Barnes, I., Becker, K. H. and Klotz, B.: Rate coefficients for the gas-phase reaction of OH radicals with selected dihydroxybenzenes and benzoquinones, *Int. J. Chem. Kinet.*, 32(11), 696–702, doi:10.1002/1097-4601(2000)32:11<696::AID-KIN5>3.0.CO;2-N, 2000.
- 30 Olariu, R. I., Bejan, I., Barnes, I., Klotz, B., Becker, K. H. and Wirtz, K.: Rate Coefficients for the Gas-Phase Reaction of NO<sub>3</sub> Radicals with Selected Dihydroxybenzenes, *Int. J. Chem. Kinet.*, 577–583, 2004.
- Razika, B., Abbes, B., Messaoud, C. and Soufi, K.: Phenol and Benzoic Acid Degradation by *Pseudomonas aeruginosa*, *J. Water Resour. Prot.*, 788–791, 2010.
- Rudich, Y., Talukdar, R. K., Fox, R. W. and Ravishankara, A. R.: Reactive Uptake of NO<sub>3</sub> on pure Water and Ionic Solutions, *J Geophys Res*, 101, 21023–21031, 1996.
- 35 Sander, R.: Compilation of Henry's law constants (version 4.0) for water as solvent, *Atmos Chem Phys*, 15(8), 4399–4981, doi:10.5194/acp-15-4399-2015, 2015.
- Umschlag, T., Zellner, R. and Herrmann, H.: Laser-based studies of NO<sub>3</sub> radical reactions with selected aromatic compounds in aqueous solution, *Phys Chem Chem Phys*, 4, 2975–2982, 2002.
- 40 Zellner, R. and Herrmann, H.: Free Radical Chemistry of the Aqueous Atmospheric Phase, in *Advances in Spectroscopy*, vol. 24, edited by R. J. H. Clark and R. E. Hester, pp. 381–451, Wiley, London., 1994.
